# Supplementary material for: Correlating doping with the stability and color rendition of red phosphors
Source: Royal Society of Chemistry journal article supplement (doi:10.1039/d2ma00617k), 2022-01-01
Supplement: d2ma00617k1.pdf [file d2ma00617k1.pdf]

# Correlating Doping with Stability and Color Rendition of Red Phosphors

Shuqin Chang<sup>a</sup>, Jipeng Fu<sup>a,b\*</sup>, Kaina Wang<sup>b</sup>, Xuan Sun<sup>a,b</sup>, Yingying Ma<sup>a</sup>, Guangcan Bai<sup>c</sup>,

Guoquan Liu<sup>c</sup>, Yonggang Wang<sup>a</sup>, and Mingxue Tang<sup>a\*</sup>

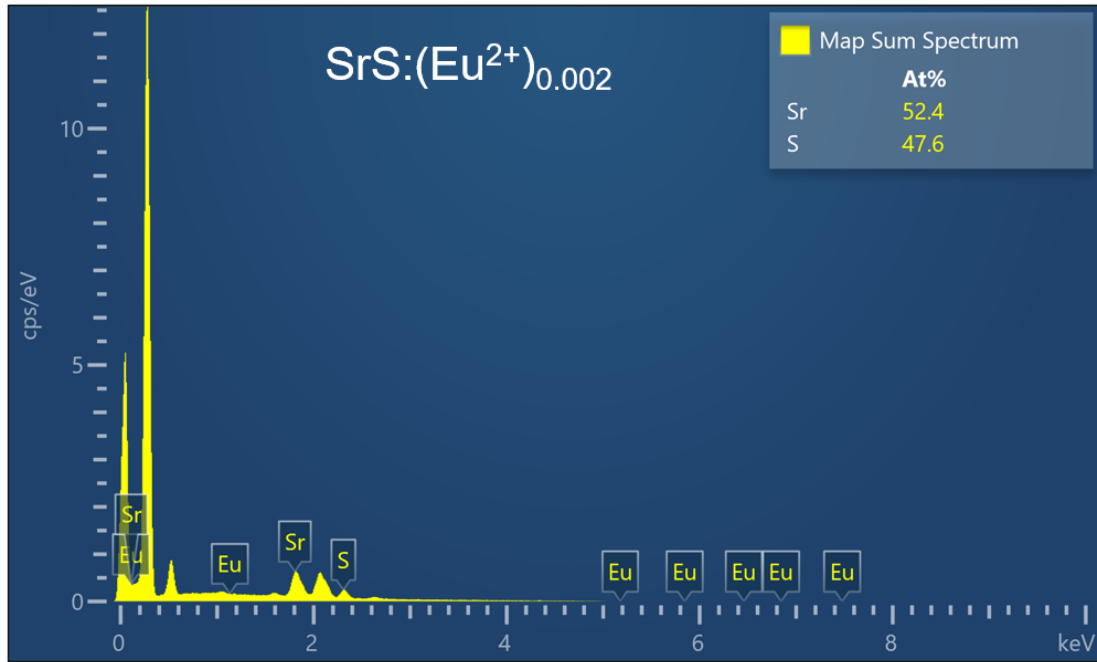

**Figure S1.** The average atomic ratio of SrS:(Eu<sup>2+</sup>)<sub>0.002</sub>.

**Table S1.** FWHM, CIE chromaticity coordinate values (CIE-x, CIE-y), CCT and color purity of SrS:(Eu<sup>2+</sup>)<sub>n</sub>.

| Sample     | FWHM (nm) | CIE-x  | CIE-y  | CCT (K) | Color purity (%) |
|------------|-----------|--------|--------|---------|------------------|
| n = 0.0005 | 78.0      | 0.6271 | 0.3723 | 1992    | 100.01           |
| n = 0.001  | 76.8      | 0.6316 | 0.3679 | 2080    | 100.02           |
| n = 0.002  | 76.5      | 0.6357 | 0.3639 | 2173    | 99.94            |
| n = 0.005  | 76.3      | 0.6445 | 0.3551 | 2429    | 100.07           |
| n = 0.01   | 76.2      | 0.6517 | 0.3480 | 2696    | 99.9             |
| n = 0.02   | 75.0      | 0.6584 | 0.3413 | 3002    | 99.77            |
| n = 0.03   | 75.4      | 0.6571 | 0.3425 | 2942    | 100.42           |
| n = 0.05   | 74.5      | 0.6589 | 0.3408 | 3028    | 99.92            |

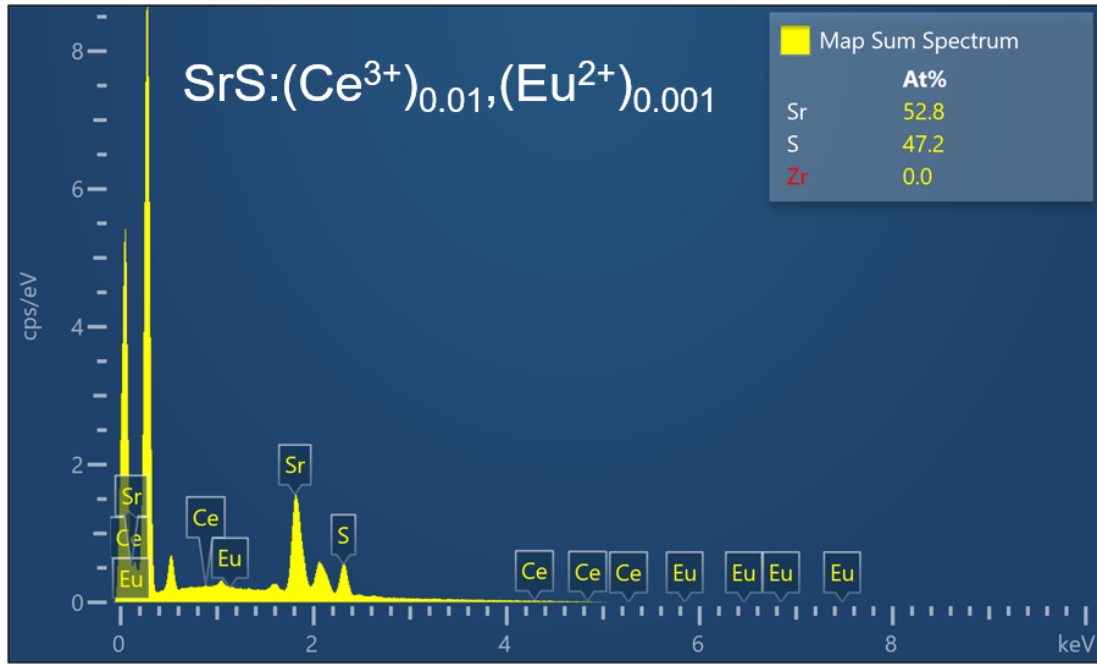

**Figure S2.** The average atomic ratio of SrS:(Ce<sup>3+</sup>)<sub>0.01</sub>,(Eu<sup>2+</sup>)<sub>0.001</sub>.

**Table S2.** FWHM, CIE chromaticity coordinate values (CIE-x, CIE-y), CCT and color purity of SrS:(Ce<sup>3+</sup>)<sub>0.01</sub>,(Eu<sup>2+</sup>)<sub>n</sub>.

| Sample     | FWHM (nm) | CIE-x  | CIE-y  | CCT (K) | Color purity (%) |
|------------|-----------|--------|--------|---------|------------------|
| n = 0.0001 | 83.5      | 0.5045 | 0.4022 | 2139    | 72.81            |
| n = 0.0005 | 78.8      | 0.5918 | 0.385  | 1764    | 92.71            |
| n = 0.001  | 78.0      | 0.6194 | 0.3742 | 1925    | 98.83            |
| n = 0.005  | 83.5      | 0.6393 | 0.3598 | 2277    | 99.74            |
| n = 0.01   | 75.8      | 0.6464 | 0.3531 | 2497    | 99.46            |
| n = 0.1    | 83.5      | 0.6559 | 0.3426 | 2920    | 100.05           |

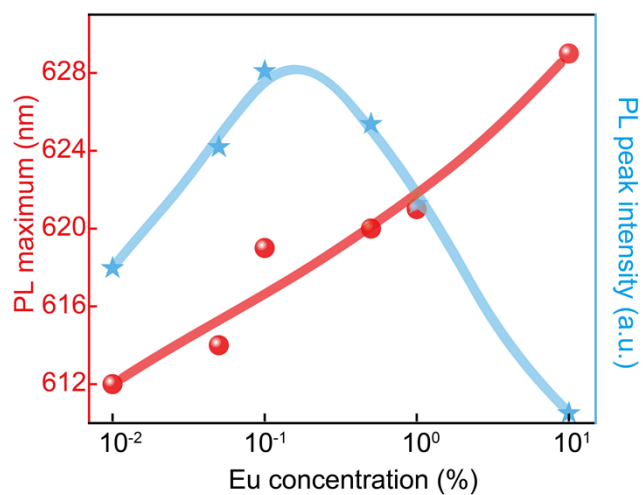

**Figure S3.** Dependence of PL maximum position and PL peak intensity on Eu<sup>2+</sup> concentration of SrS:(Ce<sup>3+</sup>)<sub>0.01</sub>(Eu<sup>2+</sup>)<sub>n</sub>, respectively. The curves in (e) are guided by eye.

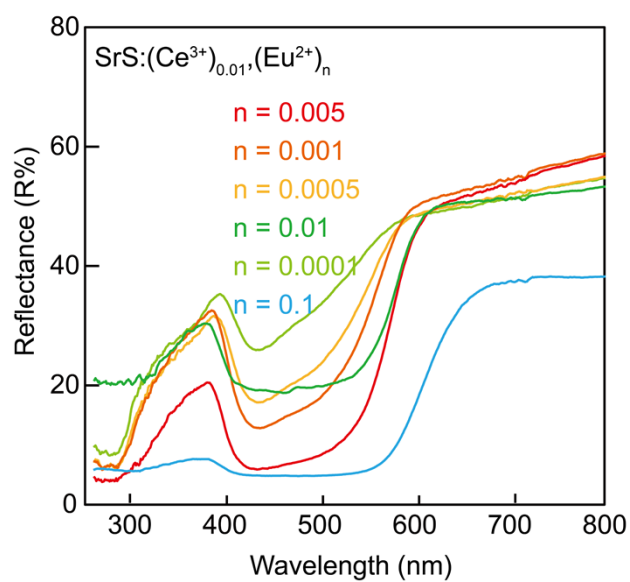

**Figure S4.** Diffuse reflection spectra of SrS:(Ce<sup>3+</sup>)<sub>0.01</sub>(Eu<sup>2+</sup>)<sub>n</sub>.

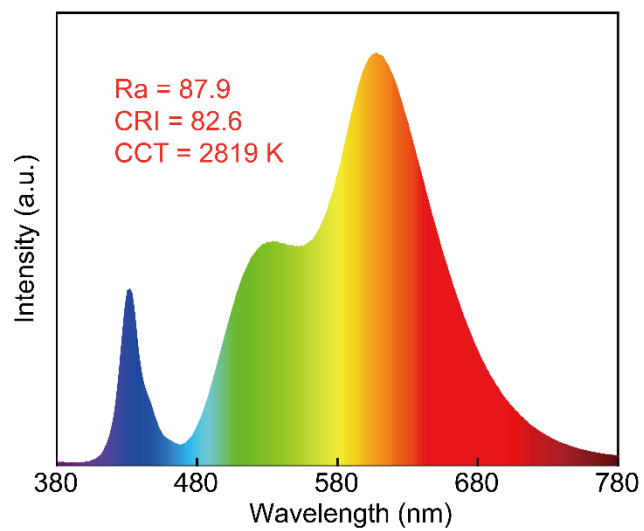

**Figure S5.** Electroluminescence spectrum of SrS:(Eu<sup>2+</sup>)<sub>0.05</sub> phosphor-based wLED under a current of 99.94 mA and a voltage of 2.821 V.
